# Supplementary material for: The Importance of an Early Evaluation after Establishing a Gluten-Free Diet in Children with Celiac Disease
Source: MDPI journal article supplement (doi:10.3390/nu15071761), 2023-04-04
Supplement: s1 [file s1]

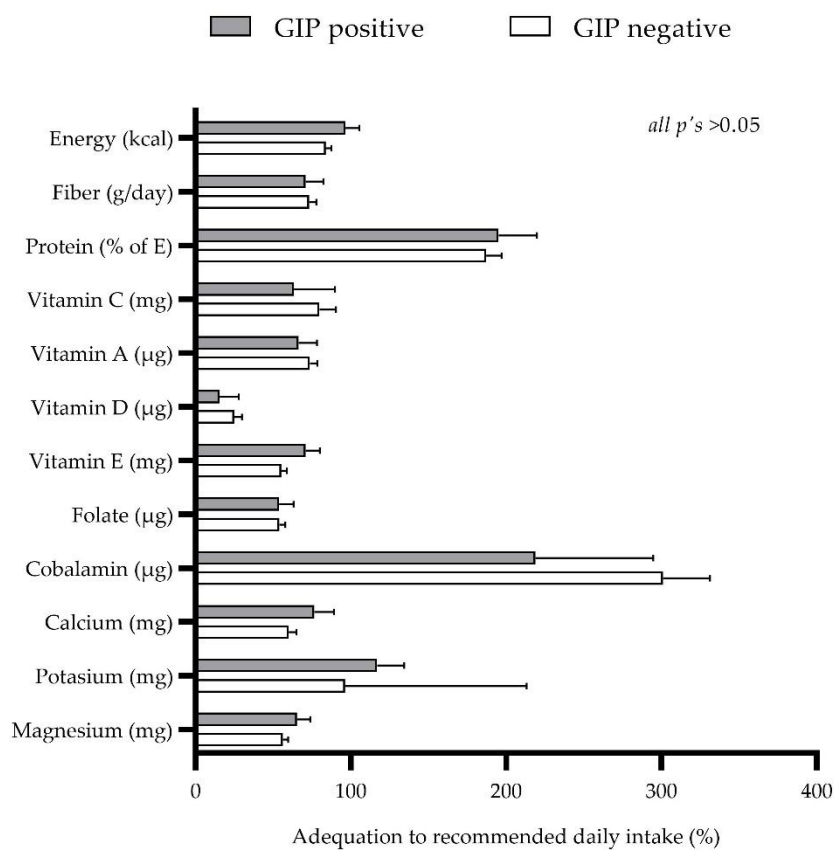

**Supplementary Figure S1.** Percentage of adequacy for energy intake, fiber, protein and micronutrients recommended daily intake in children with celiac disease according to fecal detectable gluten immunogenic peptides (n=58). Values shown as mean (standard error). Model adjusted for age, sex and body mass index.
